# Supplementary material for: MOF-templated in situ fabrication of surface-modified Ni/graphitic carbon nitride with enhanced photocatalytic hydrogen evolution
Source: Royal Society of Chemistry journal article supplement (doi:10.1039/c9cy01093a), 2019-01-01
Supplement: c9cy01093a1.pdf [file c9cy01093a1.pdf]

## MOF-templated in-situ fabrication of surface modified Ni/graphitic carbon nitride with enhanced photocatalytic hydrogen evolution

Mengli Li<sup>a,\*</sup>, Shuang Song<sup>b</sup>, Changsheng Su<sup>c</sup>, Lei Li<sup>a</sup>, Zheng Yan<sup>a</sup>, Xuebo Cao<sup>a,\*</sup>

- a. College of Biological, Chemical Sciences and Engineering, Jiaying University, 118 Jiahang Road, Jiaxing 314001, China. E-mail: menglil@zjxu.edu.cn (M.L. Li); xbcao@zjxu.edu.cn
- b. College of Architecture & Environment, Sichuan University, Chengdu 610065, China.
- c. Department of Chemical and Biomolecular Engineering, University of Notre Dame, IN 46556, USA.

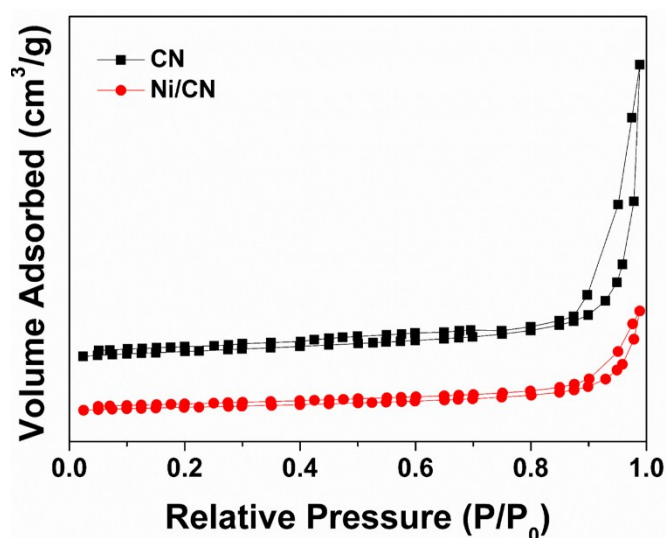

Fig. S1 N<sub>2</sub> adsorption-desorption isotherms

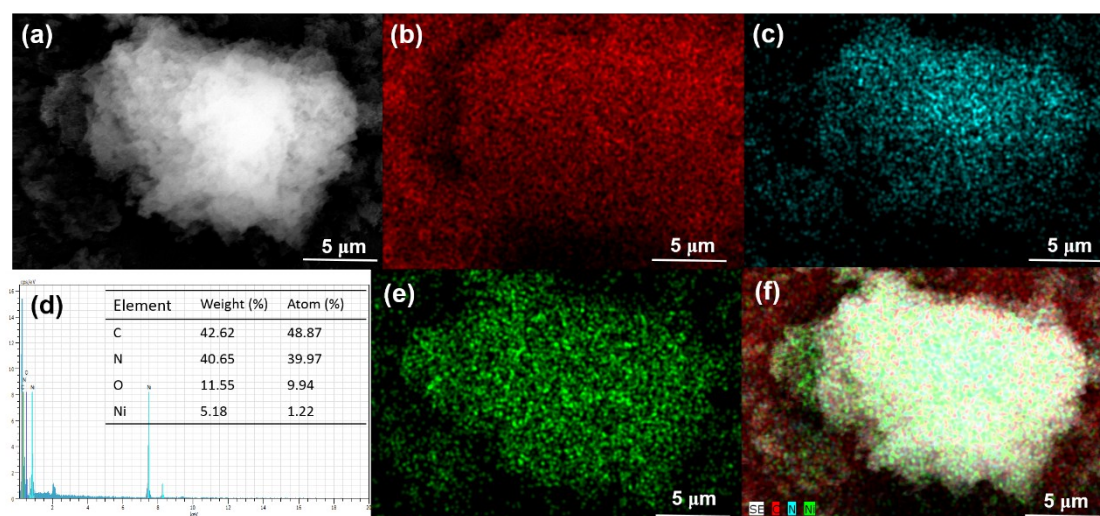

Fig. S2 (a) SEM image and (d) EDS of the Ni/CN sample, the corresponding element mappings of (b) C, (c) N, (e) Ni, and (f) merged elements picture.

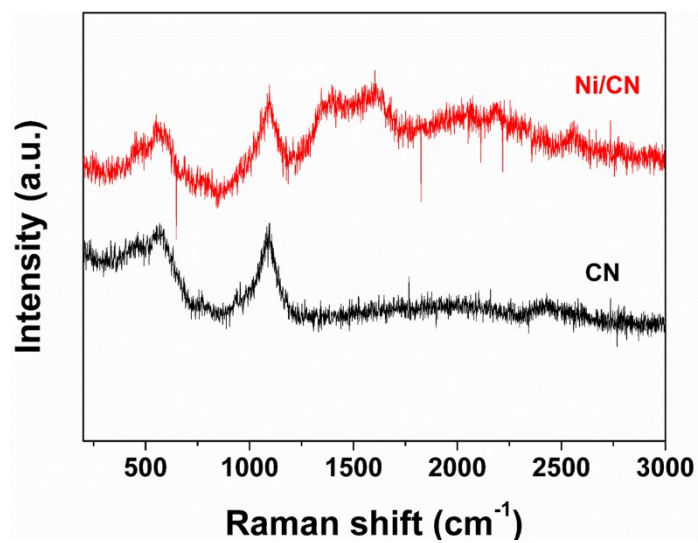

Fig. S3 Raman spectra of CN and Ni/CN

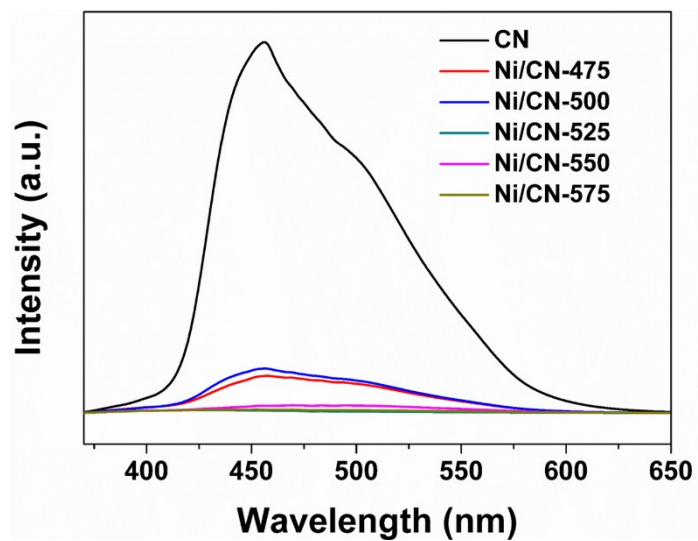

Fig. S4 Steady-state photoluminescence spectra of the samples prepared at different temperatures

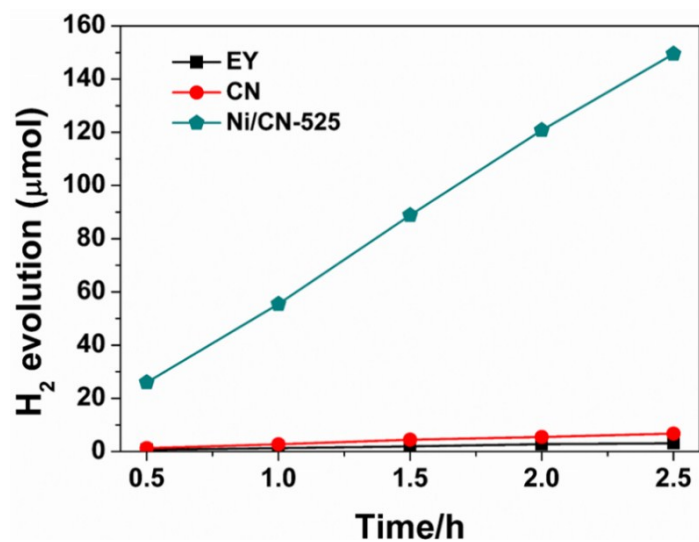

Fig. S5 H<sub>2</sub> evolution under different reaction system: in the absence of photocatalyst (EY), over pristine graphitic carbon nitride (CN) and the optimized sample Ni/CN-525.

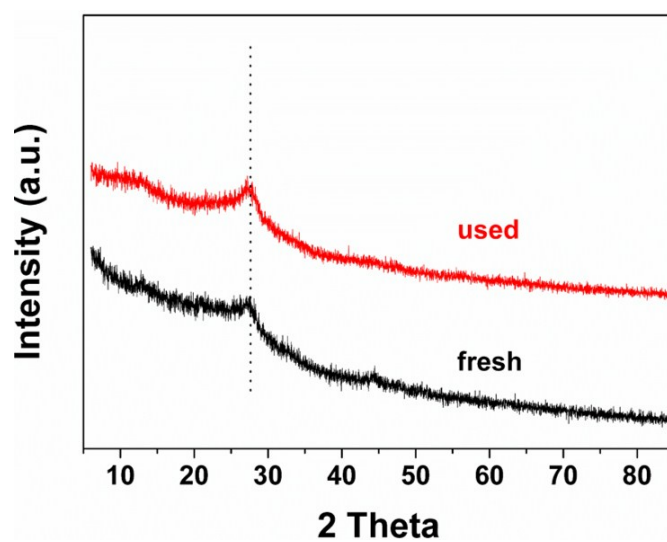

Fig. S6 XRD patterns for fresh and used Ni/CN-525 sample.

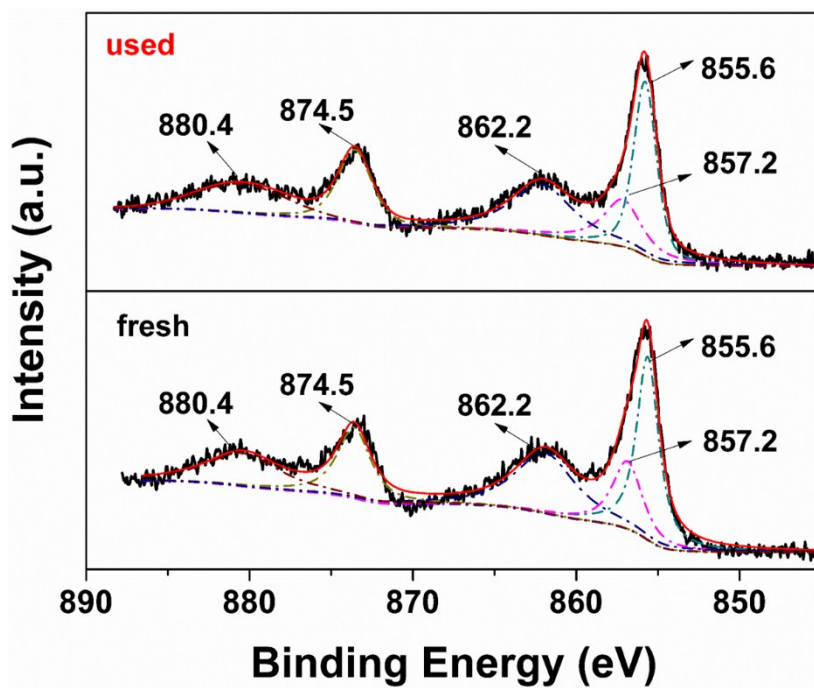

Fig. S7 High-resolution XPS spectra of used and fresh Ni/CN-525.

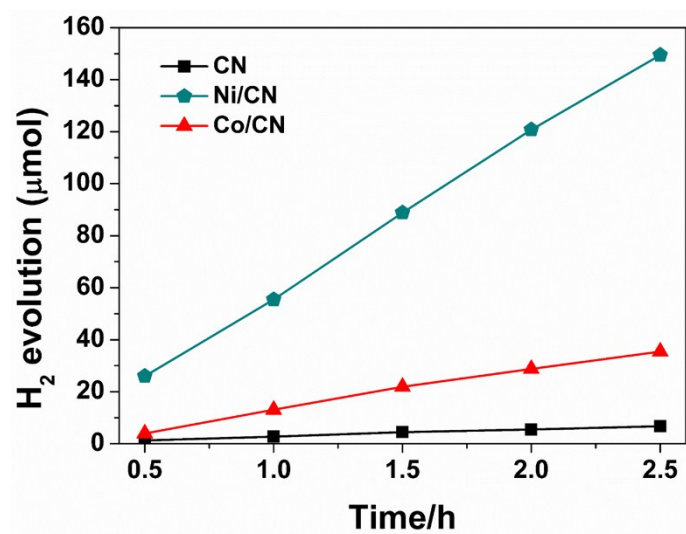

Fig. S8 Photocatalytic H<sub>2</sub> production on CN, Ni/CN and Co/CN.
